# Supplementary material for: Photocatalytic Oxidation of Amoxicillin in CPC Reactor over 3D Printed TiO2-CNT@PETG Static Mixers
Source: MDPI journal article supplement (doi:10.3390/coatings13020386), 2023-02-08
Supplement: s1 [file s1]

# Supplementary Materials: Photocatalytic oxidation of amoxicillin in CPC reactor over 3D printed TiO<sub>2</sub>/CNT – PETG static mixers

Kristina Mikleć <sup>1</sup>, Ivana Grčić <sup>1\*</sup>, Lucija Radetić <sup>1</sup>, Ivan Karlo Cingesar <sup>2</sup> and Domagoj Vrsaljko <sup>2</sup>

<sup>1</sup> University of Zagreb, Faculty of Geotechnical Engineering, Hallerova aleja 7, HR-42000 Varaždin, Croatia

<sup>2</sup> University of Zagreb, Faculty of Chemical Engineering and Technology, Marulićev trg 19, HR-10000 Zagreb, Croatia

\* Correspondence: ivana.grcic@gfv.unizg.hr

## 1. Experimental setup

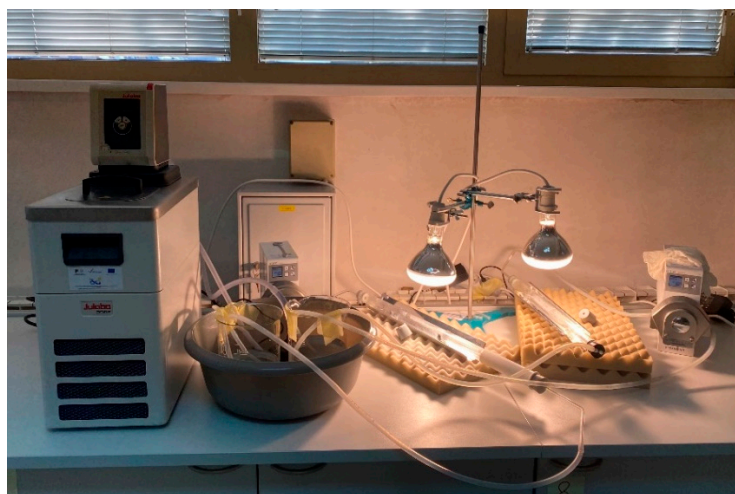

**Figure S1.** Experimental system – CPC reactor in Laboratory for Environmental Engineering (Faculty of Geotechnical Engineering, University of Zagreb).

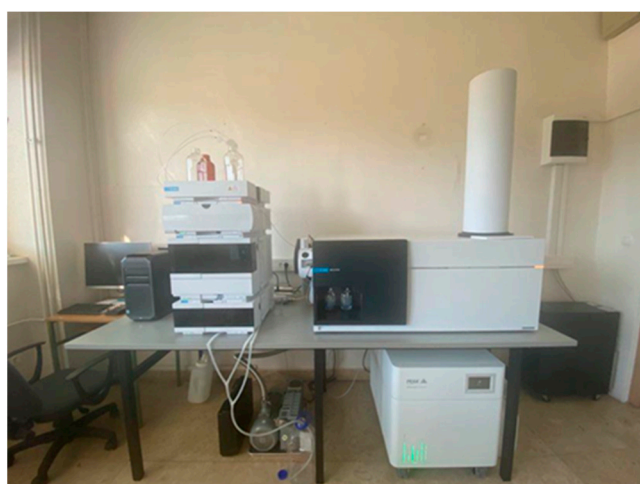

**Figure S2.** Q-TOF LC/MS (Faculty of Geotechnical Engineering, University of Zagreb).

## 2. FTIR analysis of static mixers and used materials

FTIR spectra are shown in Figure S1. Peak between wavelength 3000 cm<sup>-1</sup> and 2850 cm<sup>-1</sup> are characteristic for stretching vibrations of C – H bond in CH<sub>2</sub> groups. Peak on 1713 cm<sup>-1</sup> is related to stretching vibrations of C = O bond in carbonyl groups. All peaks

between  $1600\text{ cm}^{-1}$  and  $1450\text{ cm}^{-1}$  are connected with stretching vibrations of C – C bond in benzene ring. Strong peak occurs on  $1240\text{ cm}^{-1}$  which indicated presence of ester groups.  $1093\text{ cm}^{-1}$  and  $1016\text{ cm}^{-1}$  peaks are related to the in-plane vibrations of the C – H bonds [21]. Furthermore, C – H out-of-plane deformation of two carbonyl substituents on the aromatic ring on  $723\text{ cm}^{-1}$  are visible in FTIR spectra [22]. All the peaks are visible in all of the characterized samples.

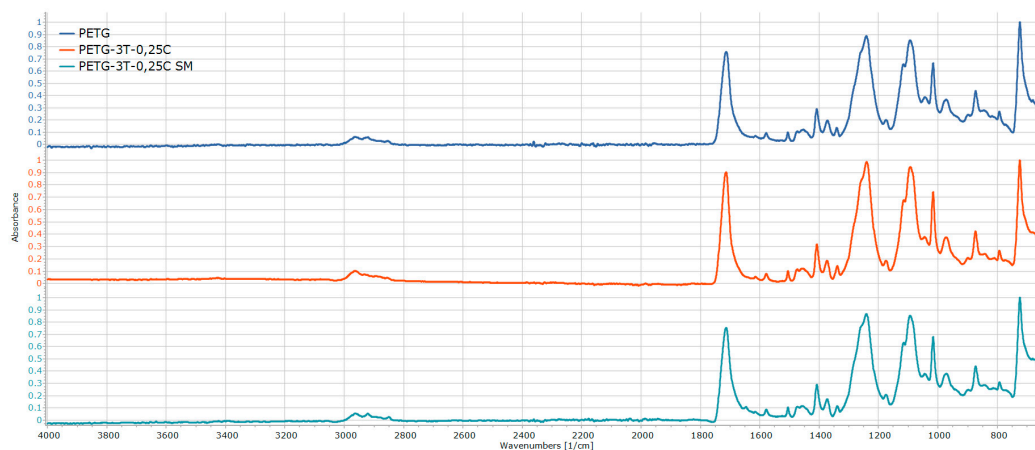

**Figure S3.** FTIR spectra of a PETG, PETG-3T-0,25C and PETG-3T-0,25C SM.

### 3. Surface investigation

Water contact angles were measured to define the surface hydrophilicity.

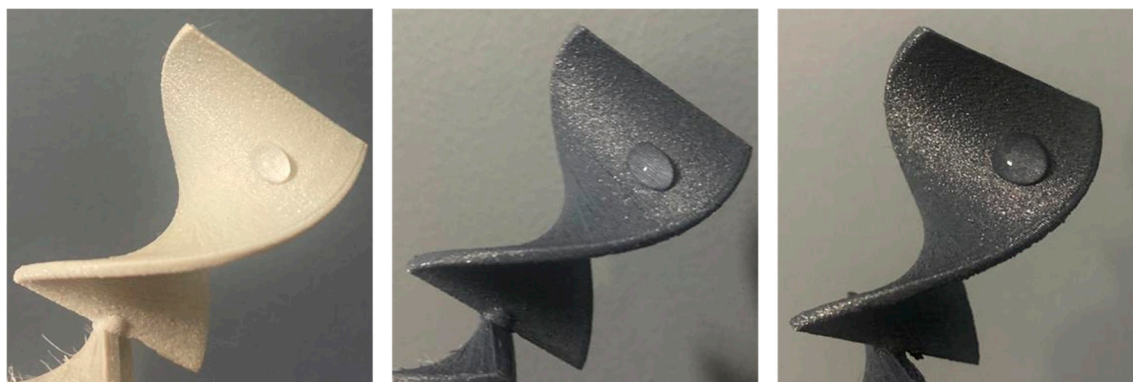

**Figure S4.** Visualization of water drop on static mixers with fillers: (from left to right)  $3\text{TiO}_2\text{-0CNT @PETG}$ ,  $3\text{TiO}_2\text{-0.25CNT @PETG}$ ,  $3\text{TiO}_2\text{-0.5CNT @PETG}$ .

Measured water contact angle for pure PETG static mixer (referent) was  $(63.8 \pm 0.5)^\circ$ . Similar results were obtained for static mixers with only  $\text{TiO}_2$  added as fillers, while water contact angles for mixers with CNT were higher. E.g. measured angle for  $3\text{TiO}_2\text{-0.25CNT @PETG}$  was  $(91.1 \pm 3.5)^\circ$ .

#### 4. Chromatograms and mass spectra

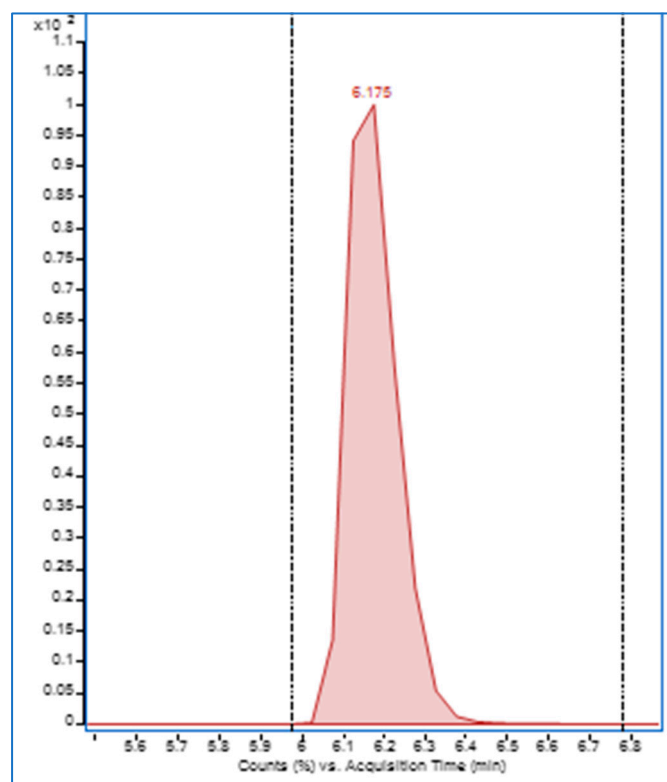

Figure S5. Chromatogram results - amoxicillin.

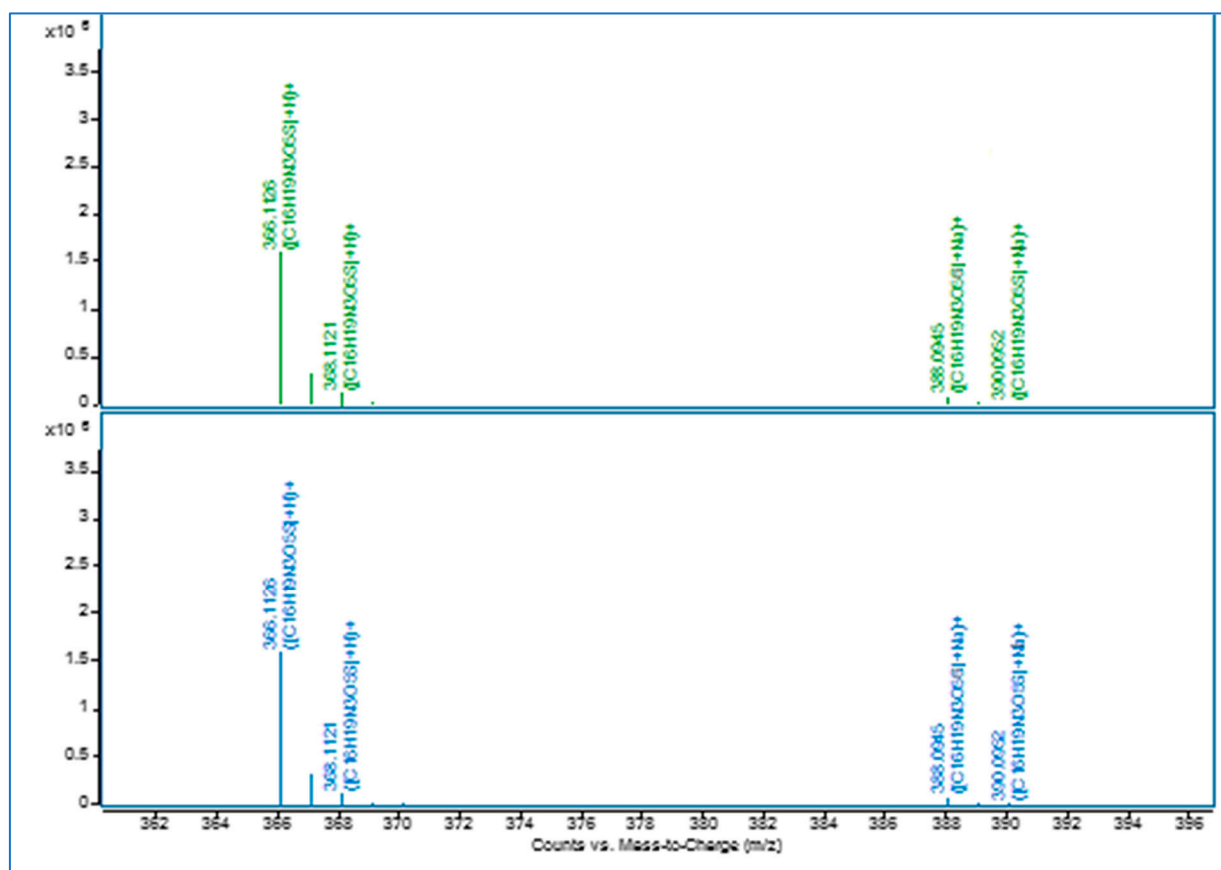

Figure S6. MS spectrum results - amoxicillin.

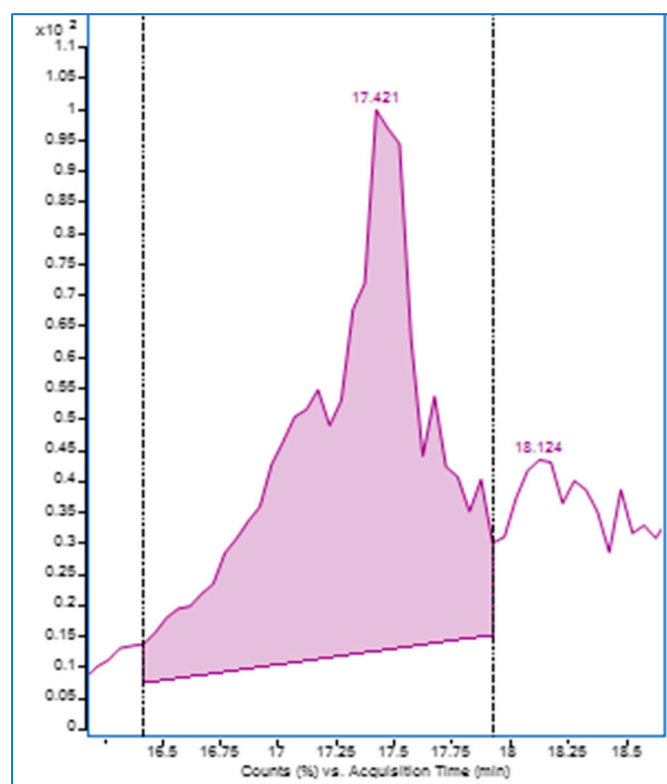

Figure S7. Chromatogram results - Photocatalysis product #1.

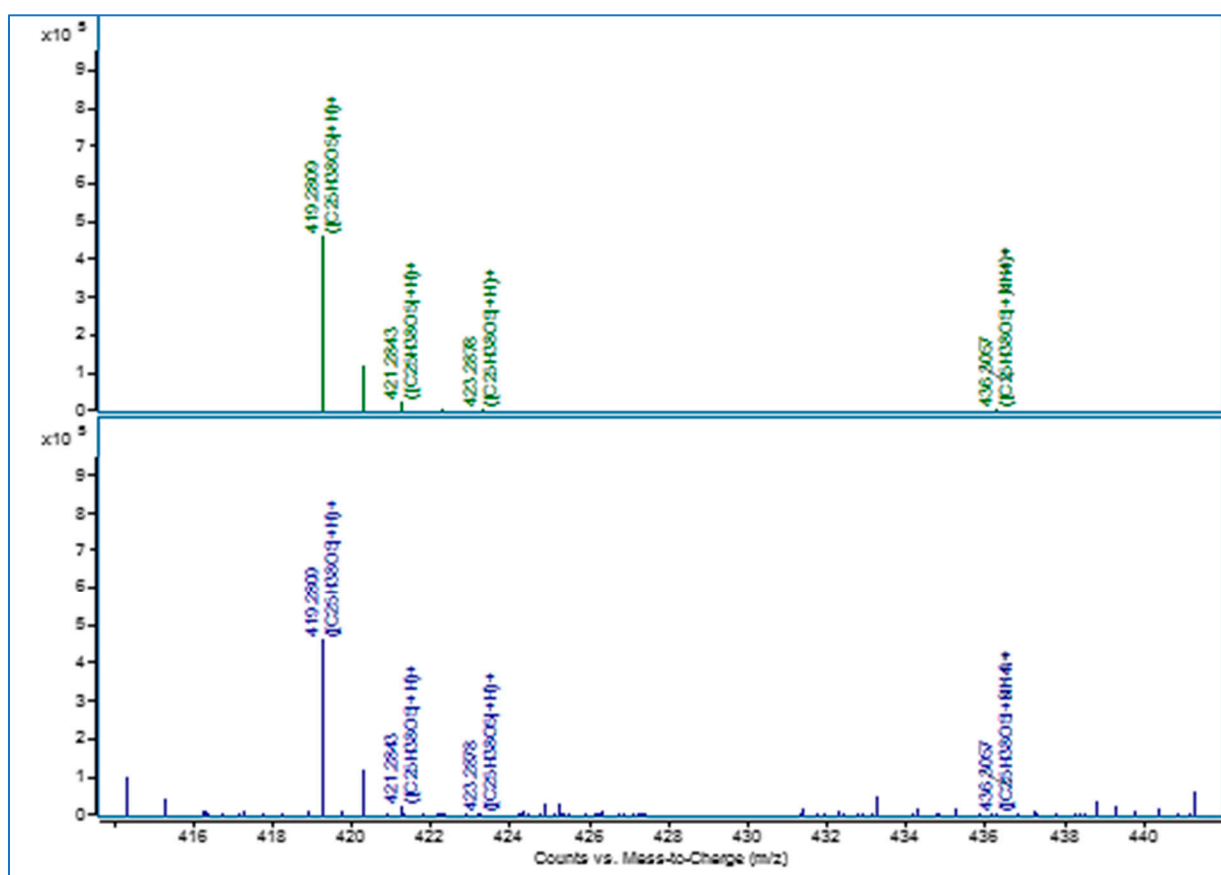

Figure S8. MS spectrum results - Photocatalysis product #1.

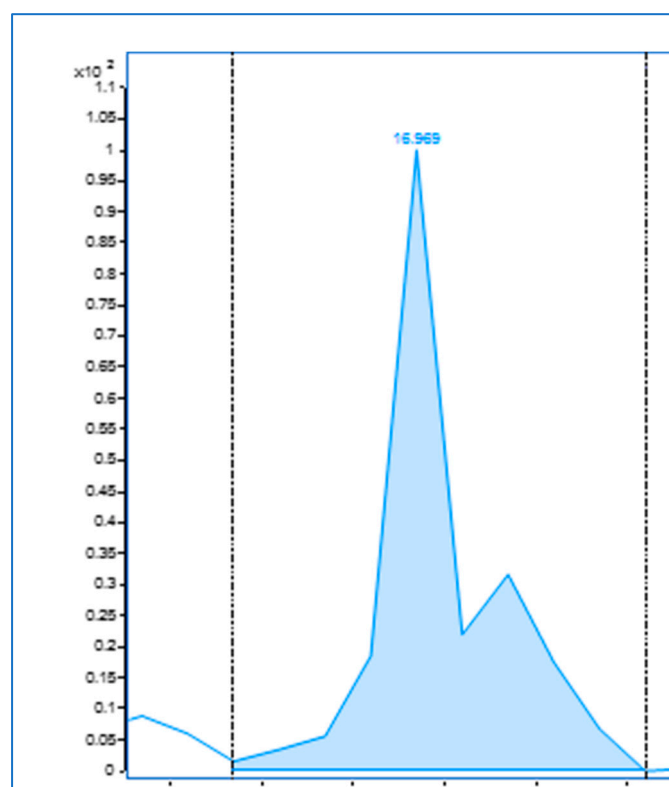

**Figure S9.** Chromatogram results - 2-Amino-2-(4-hydroxyphenyl)-N-((Z)-[3-(4-hydroxyphenyl)-2-oxo-2,3,6,7-tetrahydro1H-1,4-diaze-pin-5-yl]methylidene)-acetamide.

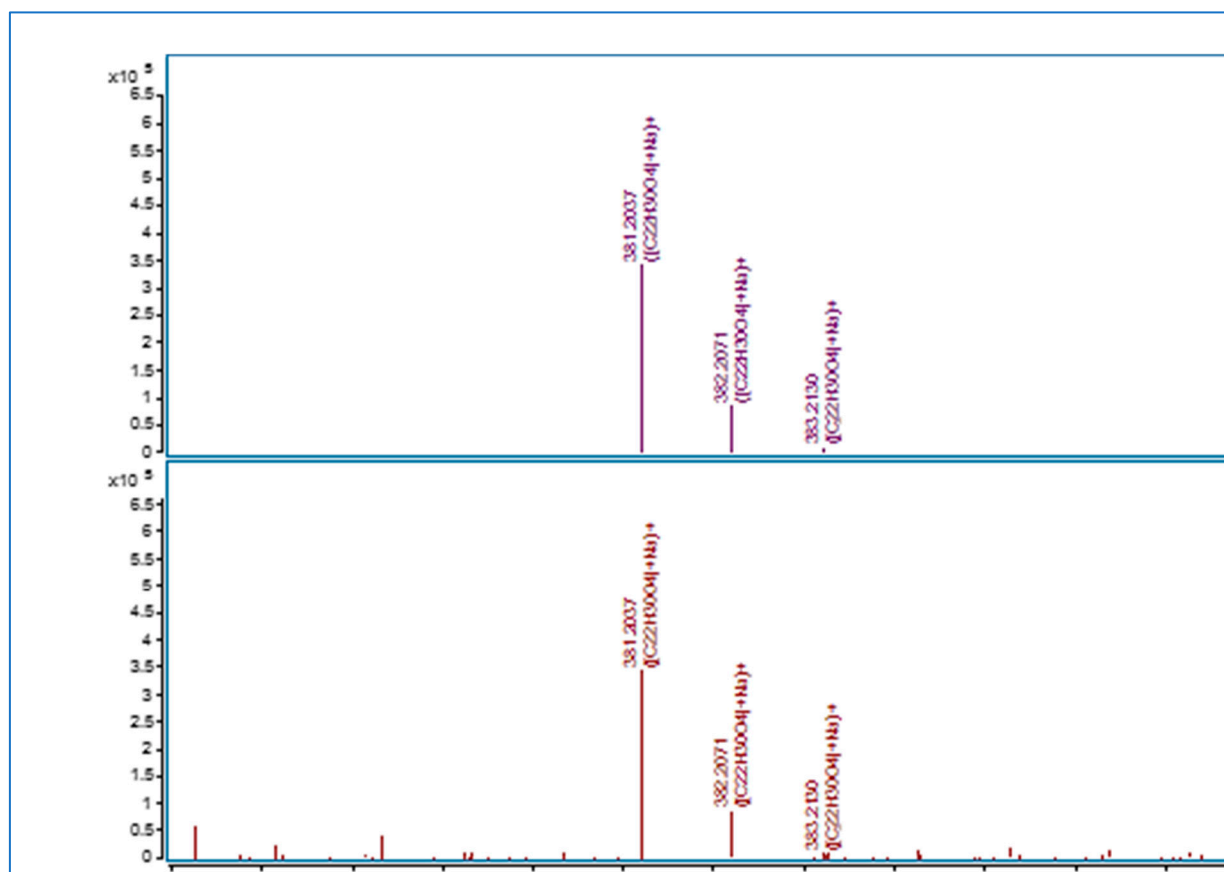

**Figure S10.** MS spectrum results - 2-Amino-2-(4-hydroxyphenyl)-N-((Z)-[3-(4-hydroxyphenyl)-2-oxo-2,3,6,7-tetrahydro1H-1,4-diaze-pin-5-yl]methylidene)-acetamide.

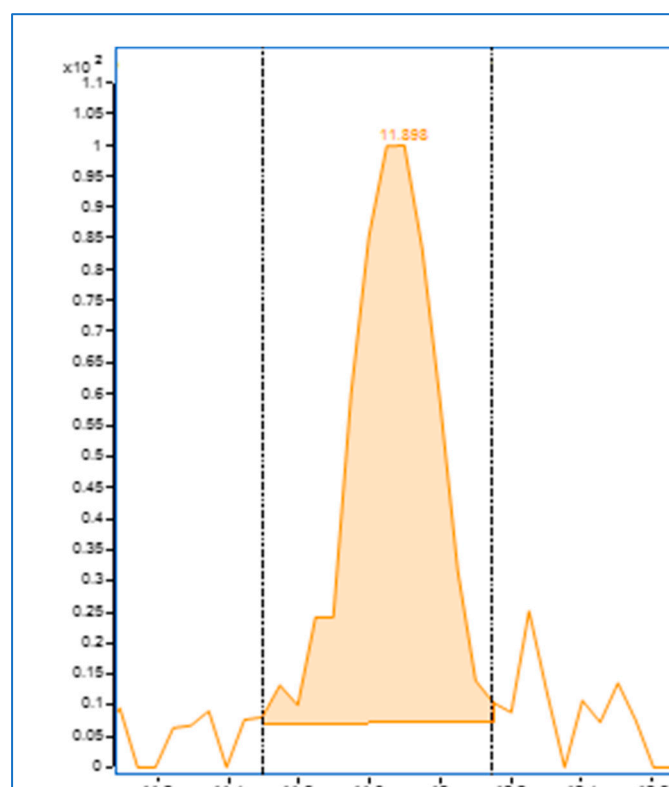

Figure S11. Chromatogram results - Dehydrocarboxylated amoxicillin penilloic acid.

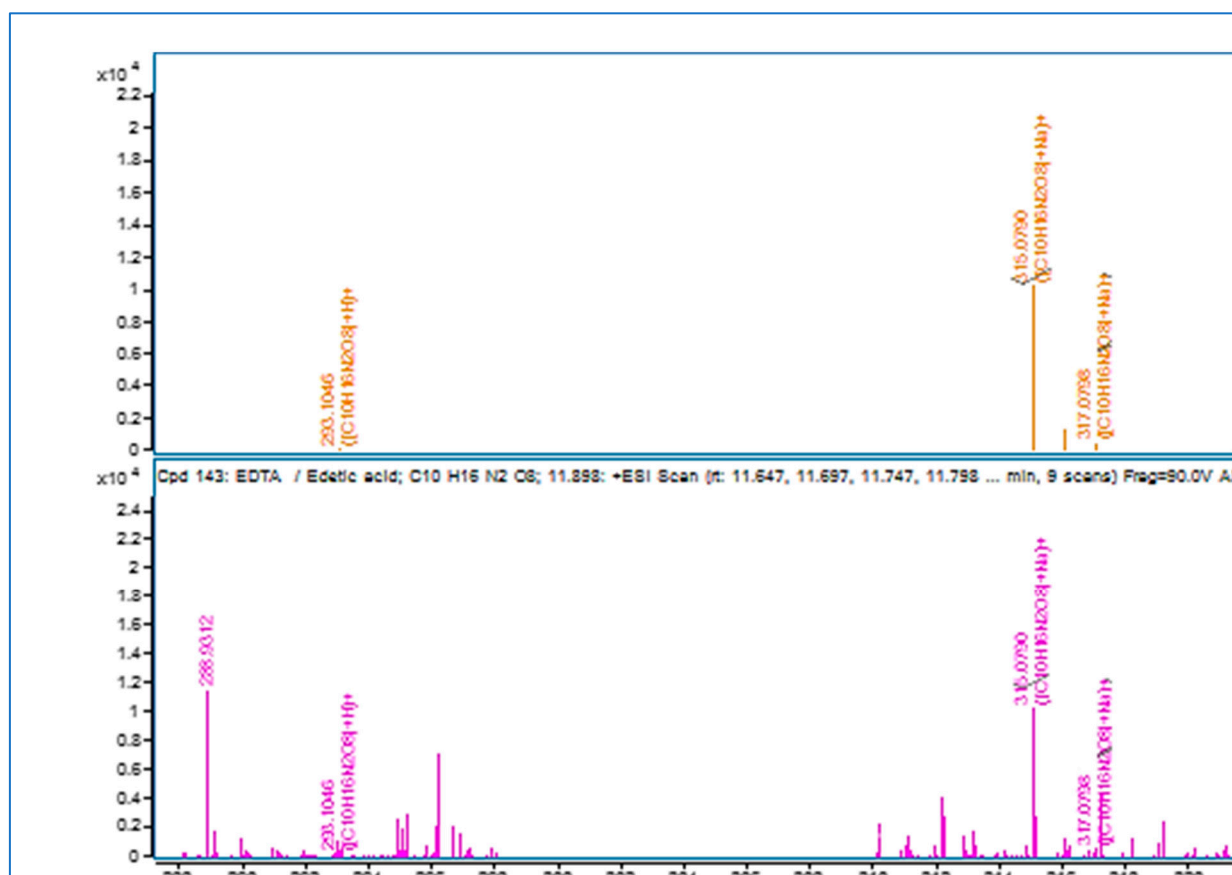

Figure S12. MS spectrum results - Dehydrocarboxylated amoxicillin penilloic acid.

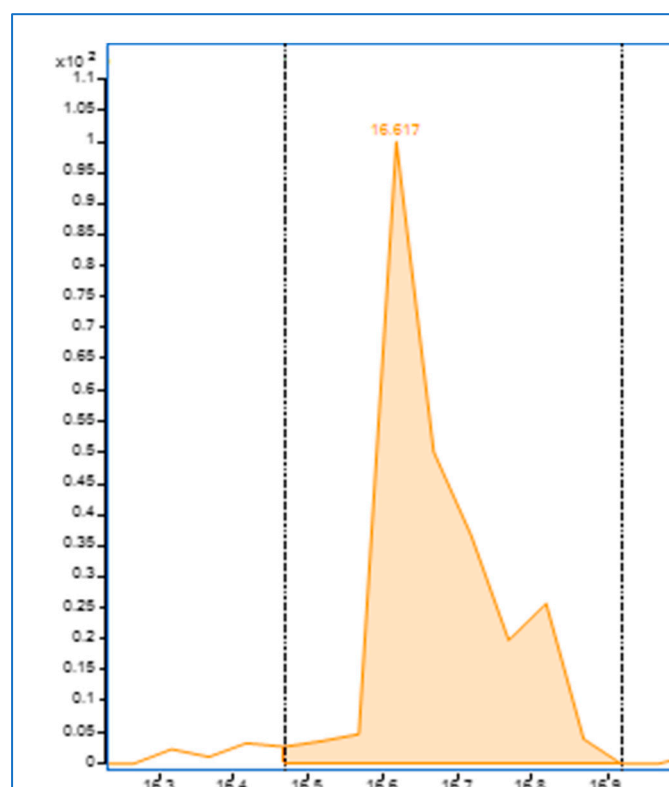

Figure S13. Chromatogram results - Amoxicillin penicilloic acid.

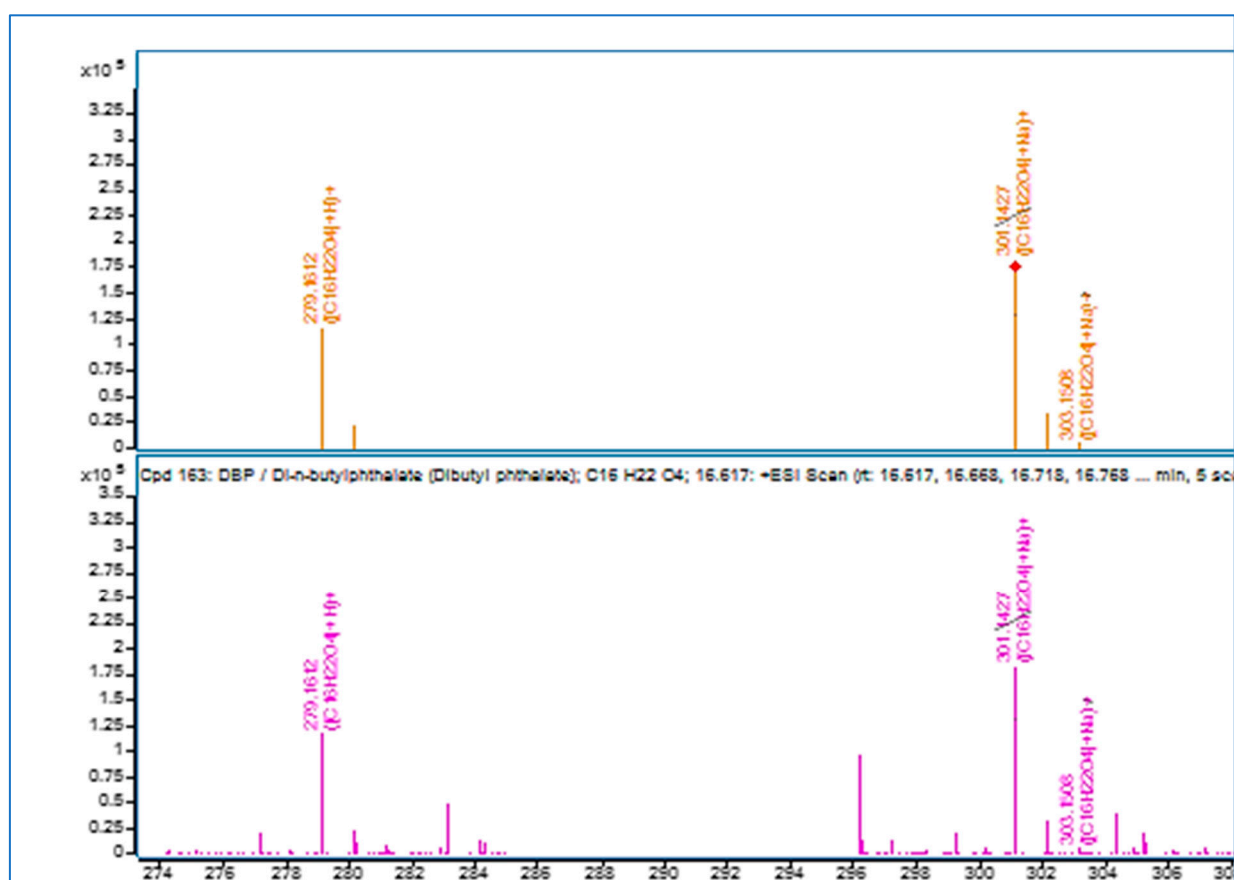

Figure S14. MS spectrum results - Amoxicillin penicilloic acid.

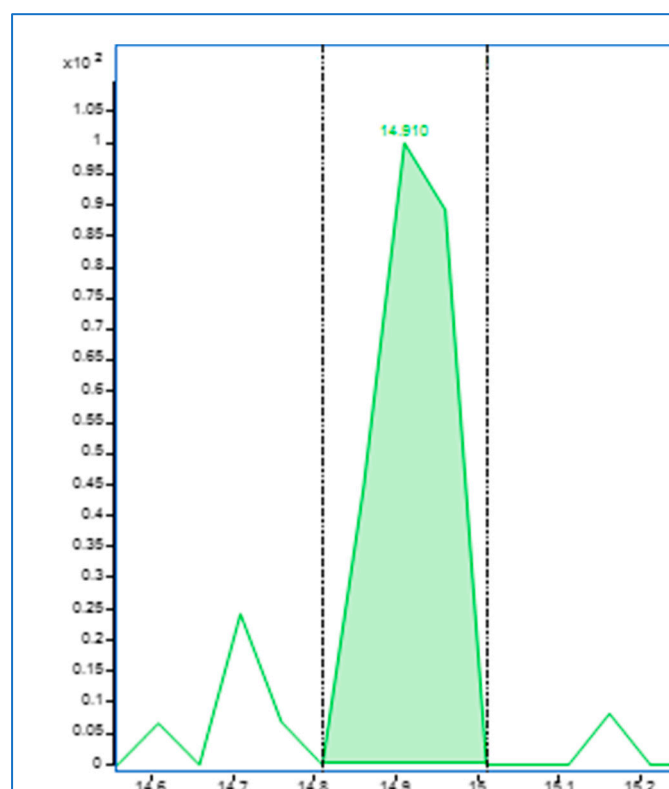

Figure S15. Chromatogram results - Photocatalysis product #2.

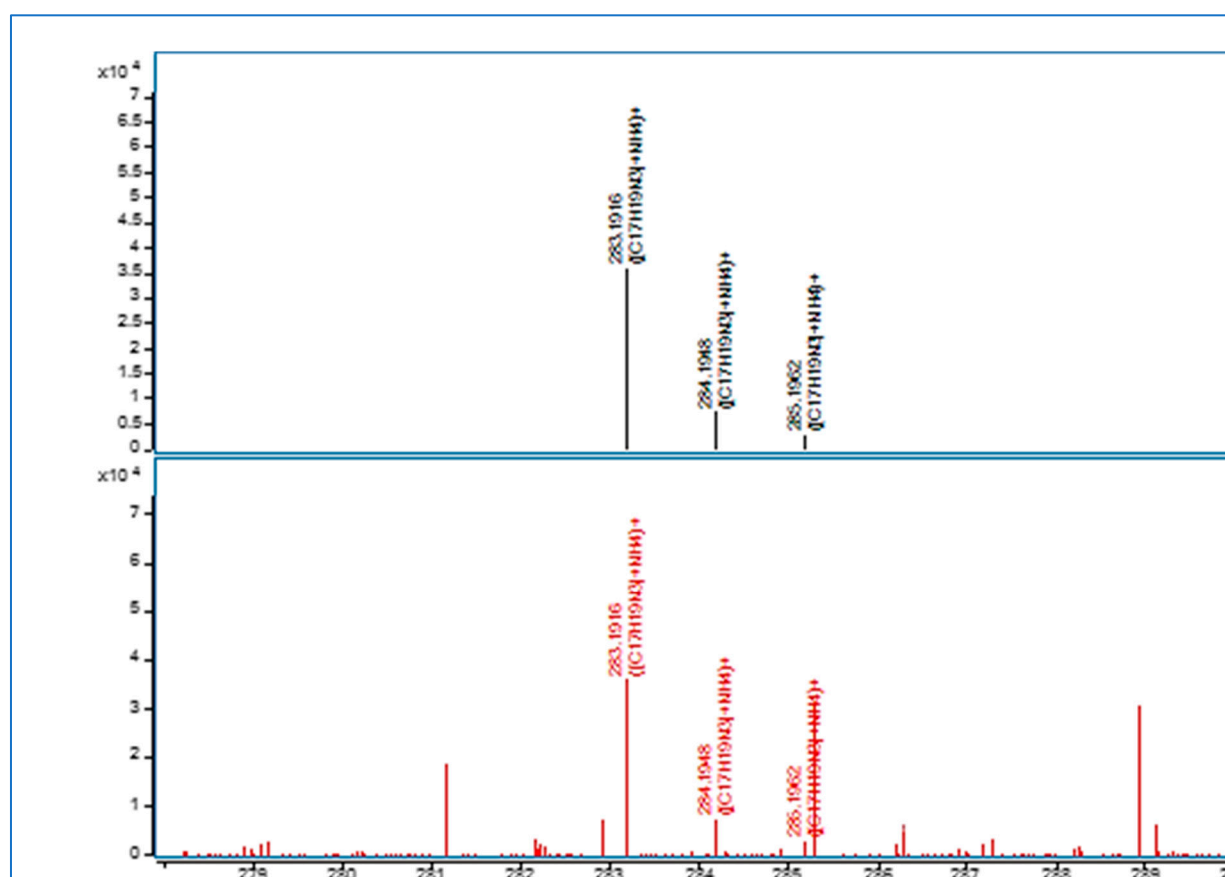

Figure S16. MS spectrum results - Photocatalysis product #2.



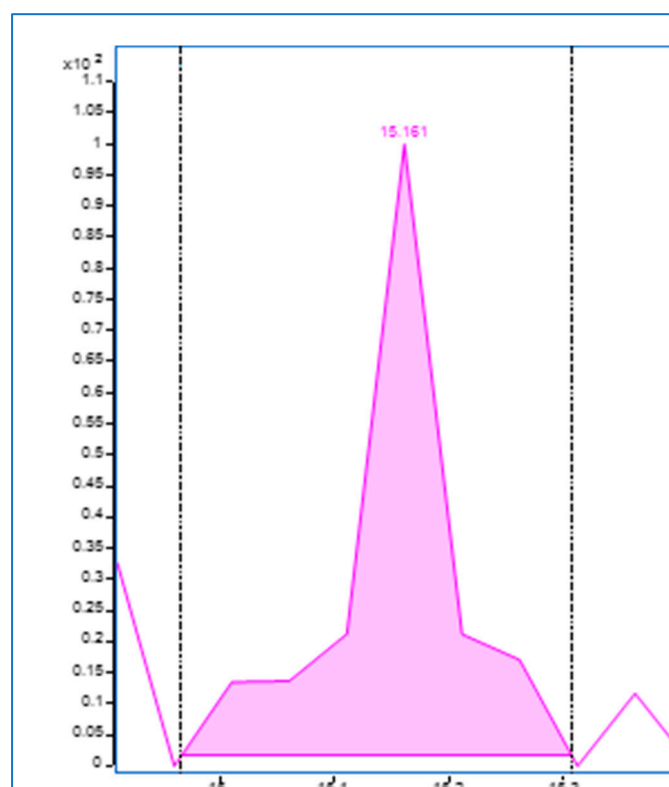

Figure S17. Chromatogram results - Photocatalysis product #3.

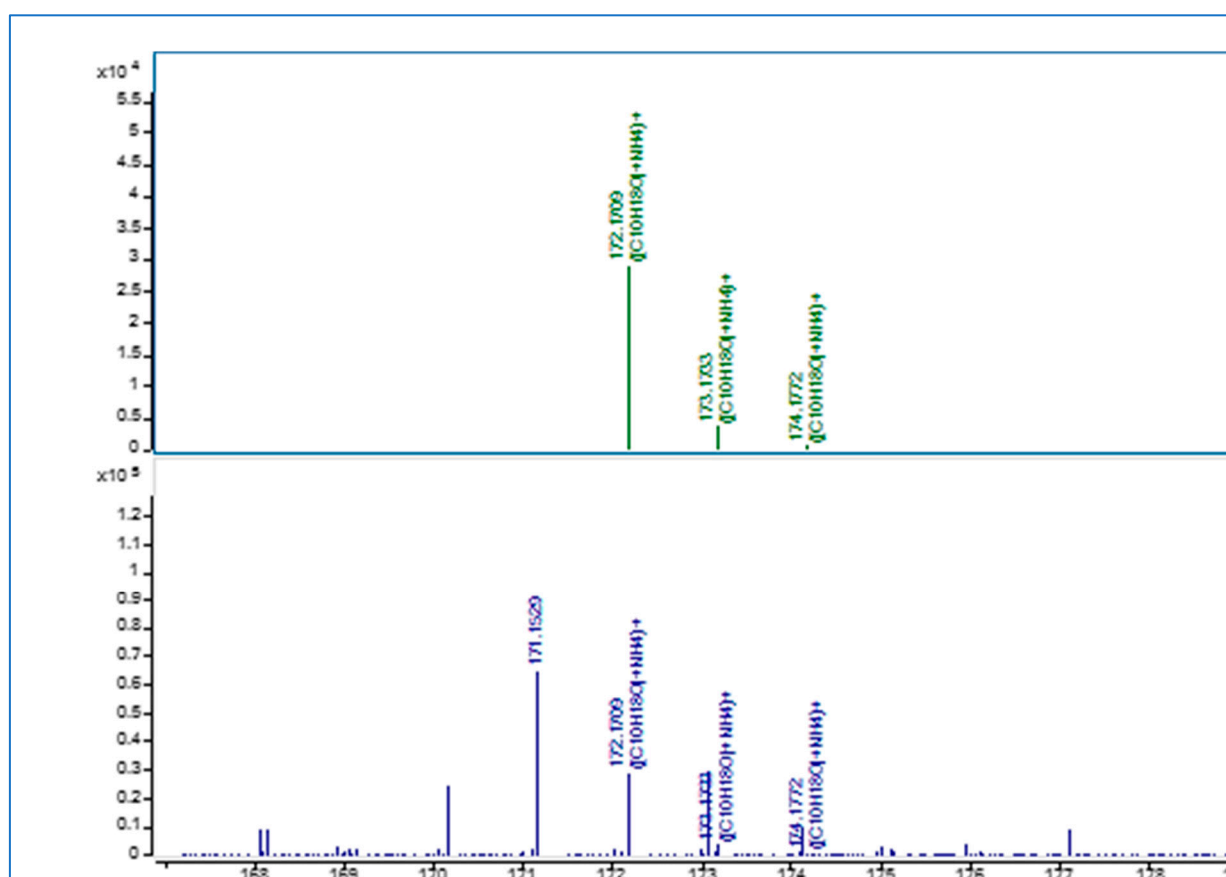

Figure S18. MS spectrum results - Photocatalysis product #3.

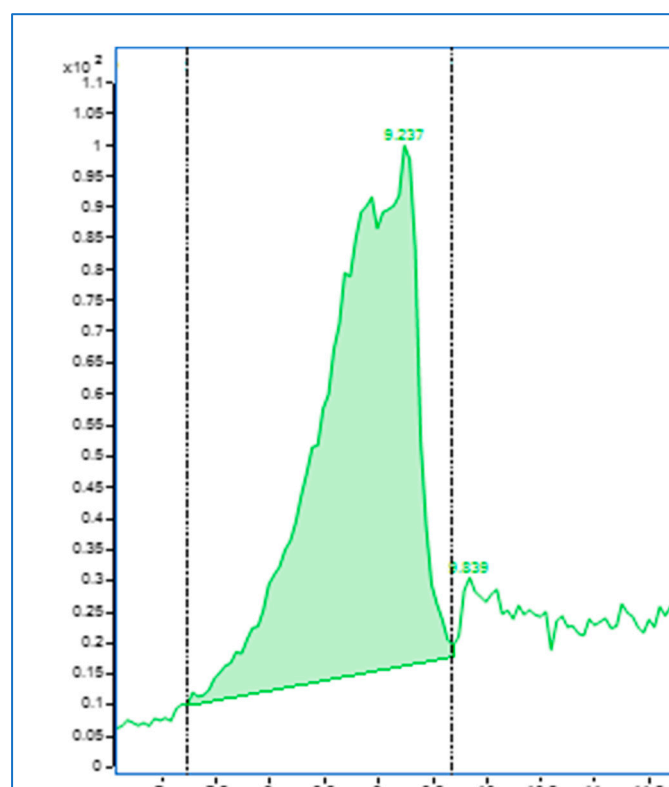

Figure S19. Chromatogram results - Photocatalysis product #4.

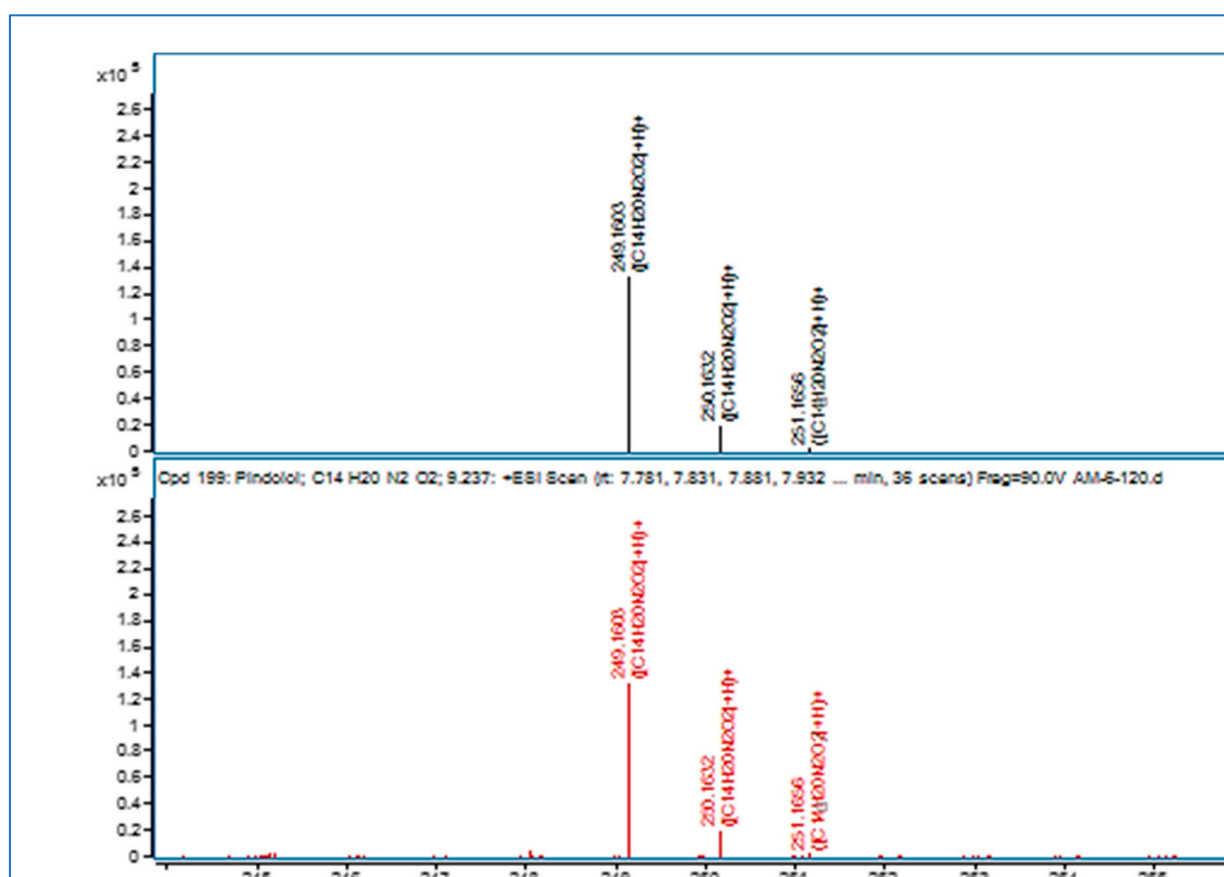

Figure S20. MS spectrum results - Photocatalysis product #4.

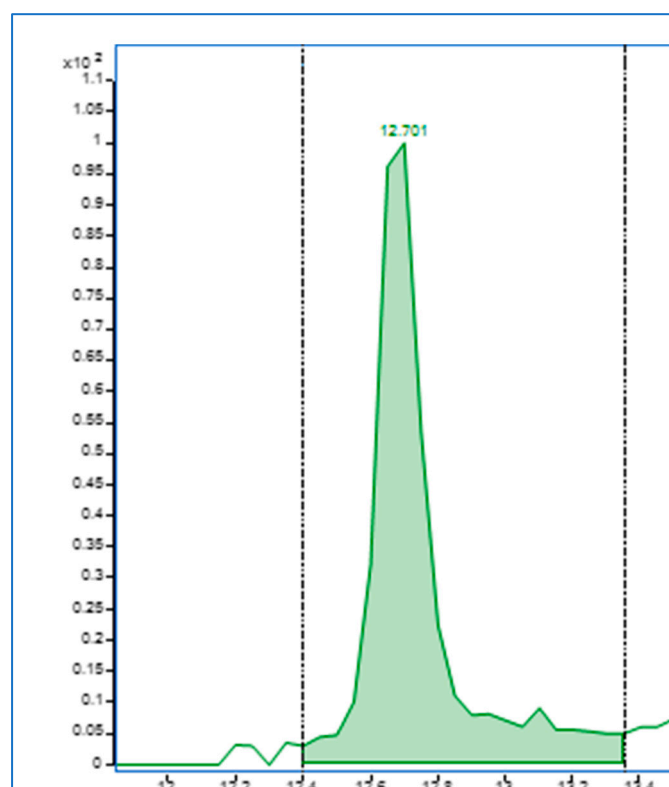

Figure S21. Chromatogram results - Photocatalysis product 5.

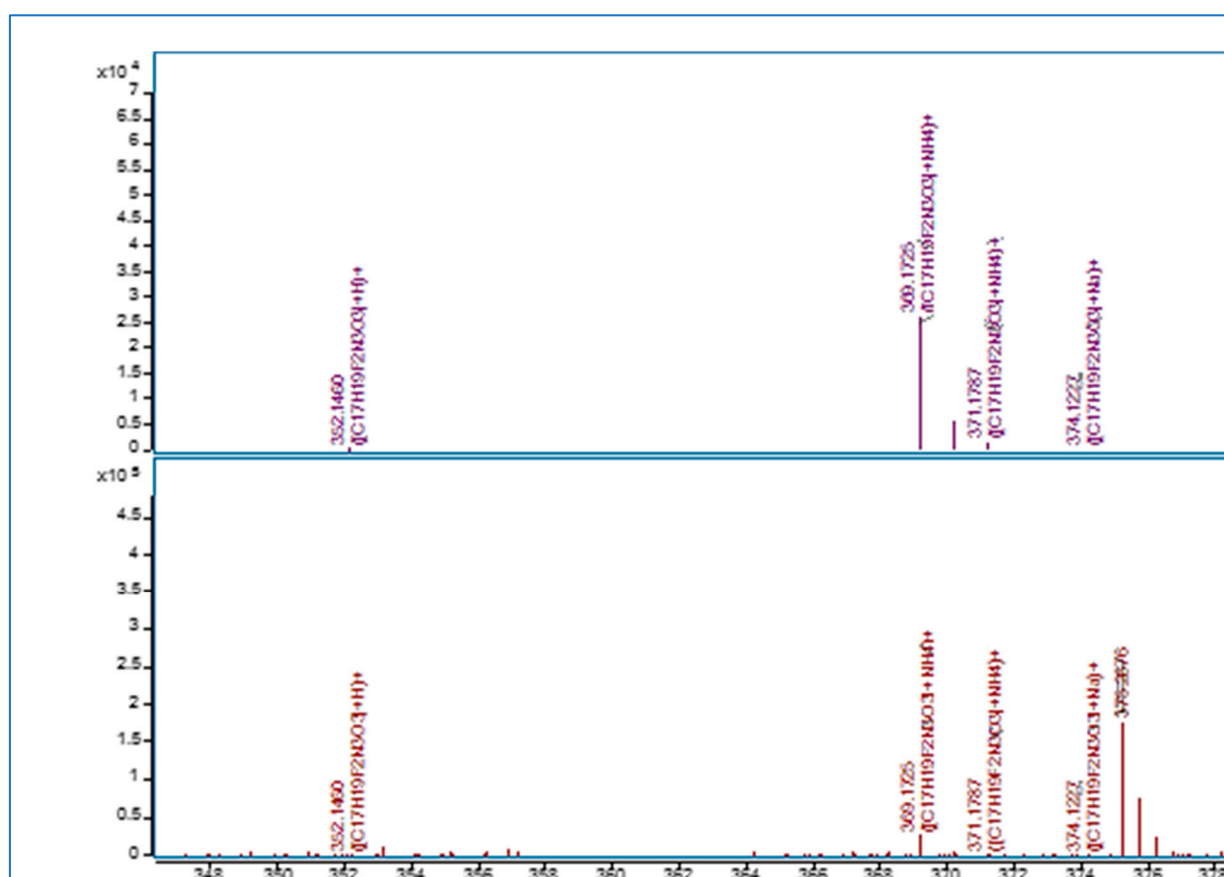

Figure S22. MS spectrum results - Photocatalysis product #5.

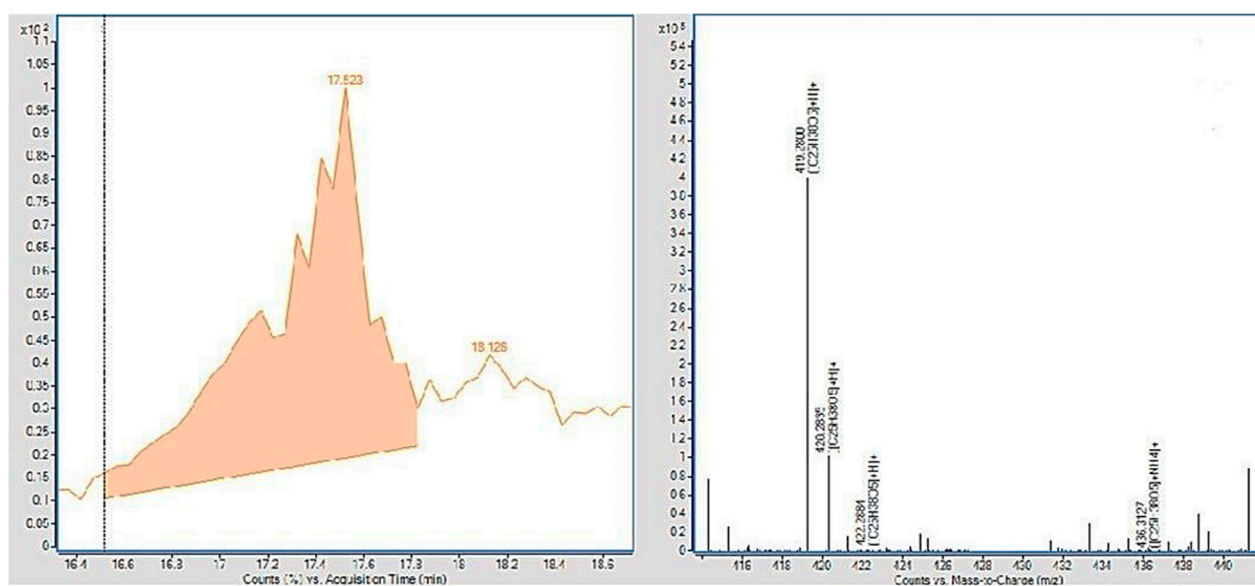

Figure S23. Chromatogram and MS spectrum results of a photolysis product #1.

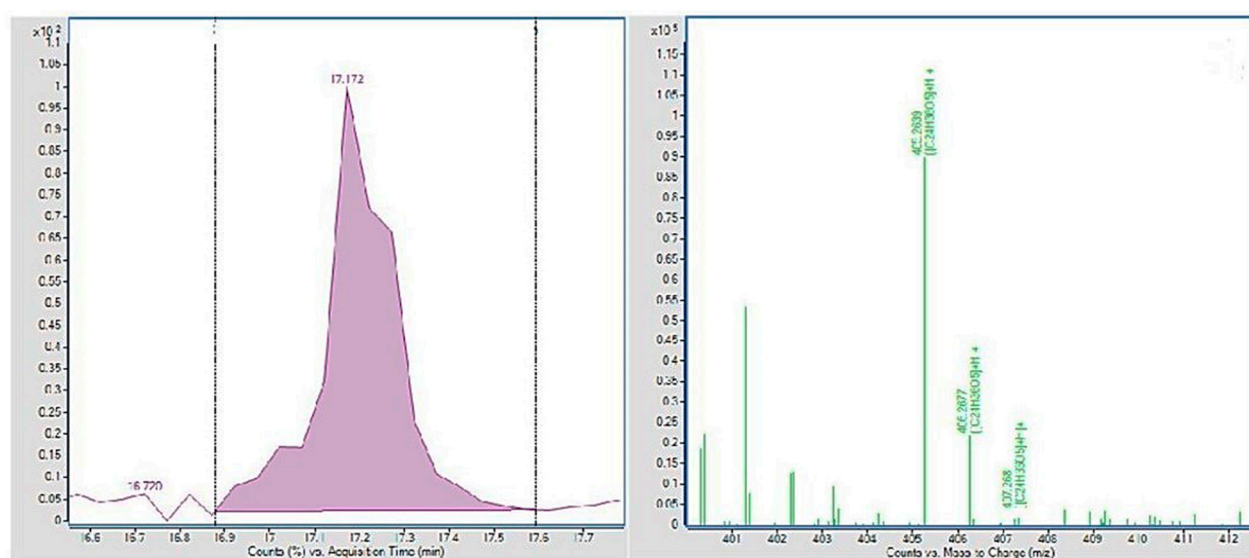

Figure S24. Chromatogram and MS spectrum results of a photolysis product #2.

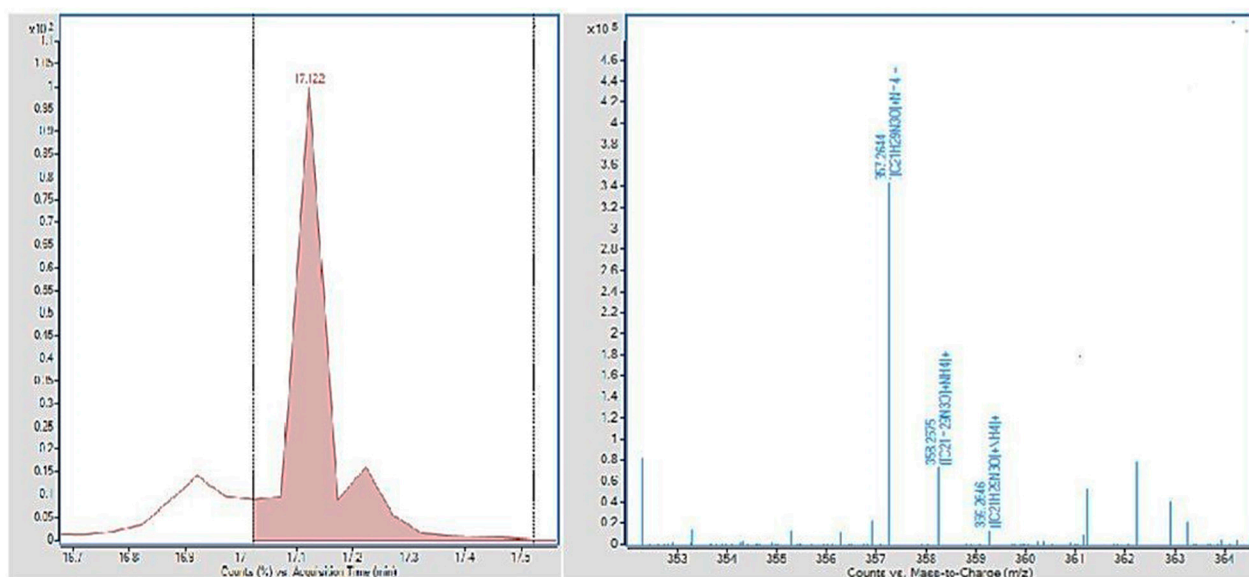

**Figure S25.** Chromatogram and MS spectrum results of a photolysis product #3.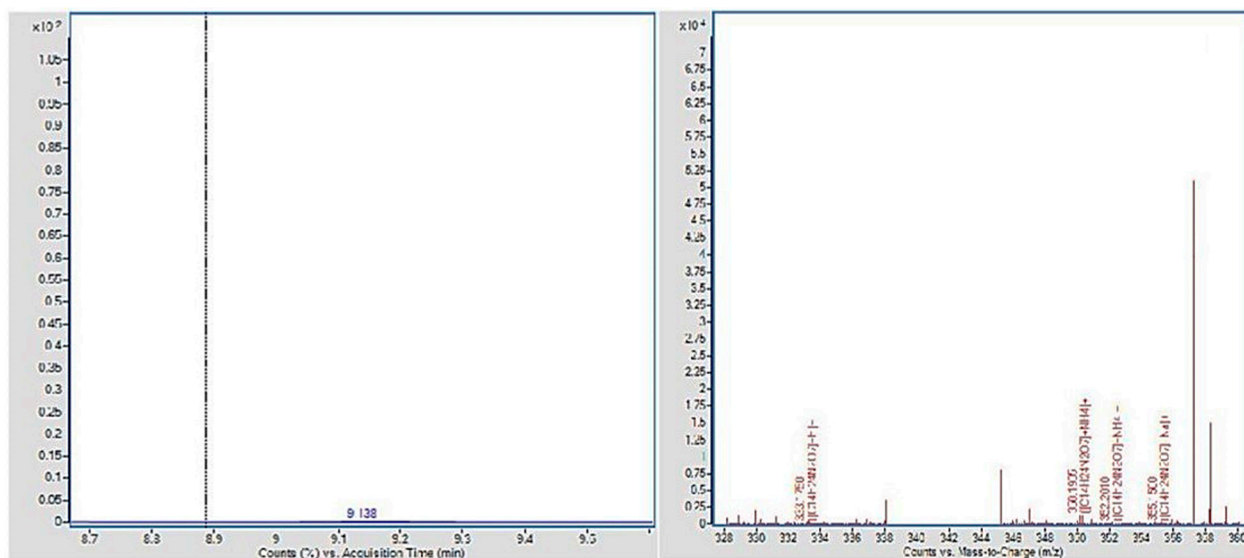**Figure S26.** Chromatogram and MS spectrum results of a photolysis product #4.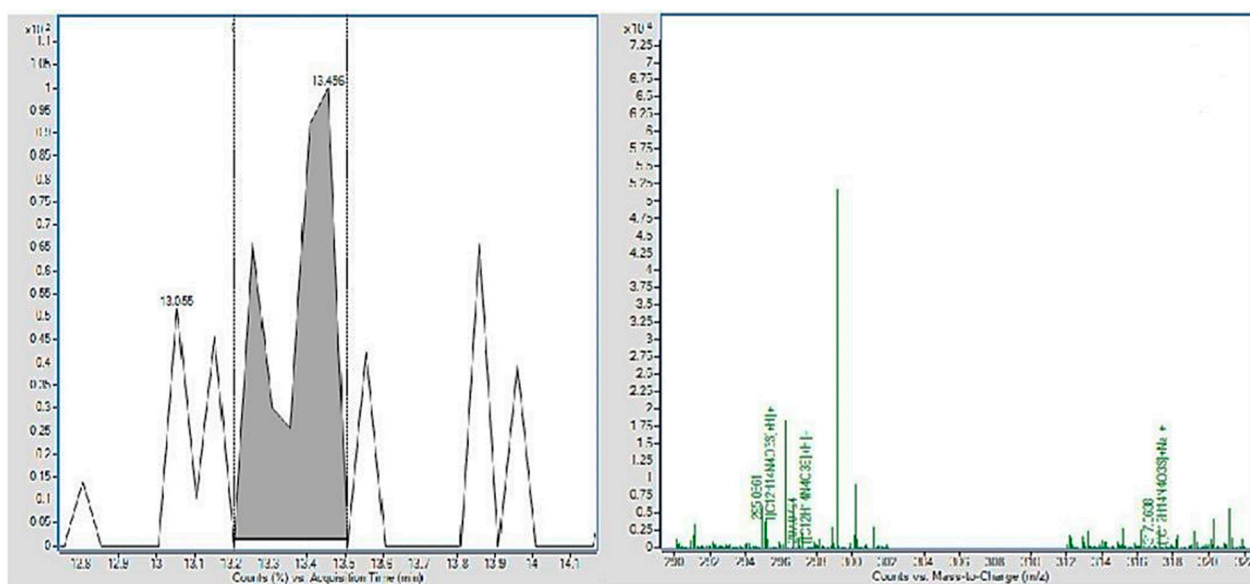**Figure S27.** Chromatogram and MS spectrum results of a photolysis product #5.

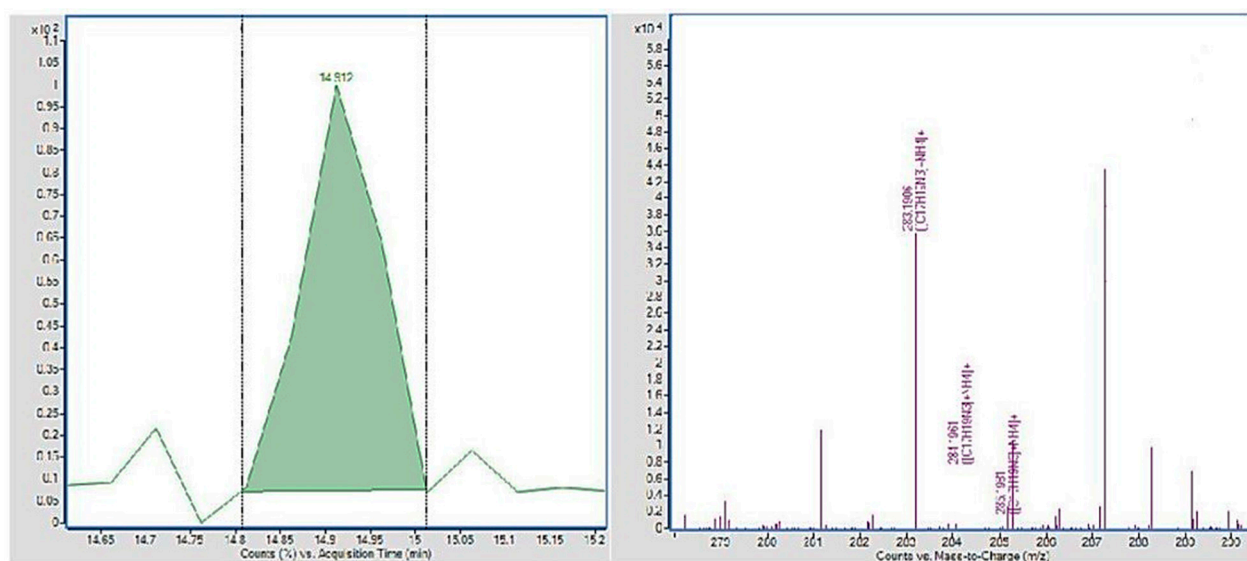

Figure S28. Chromatogram and MS spectrum results of a photolysis product #6.

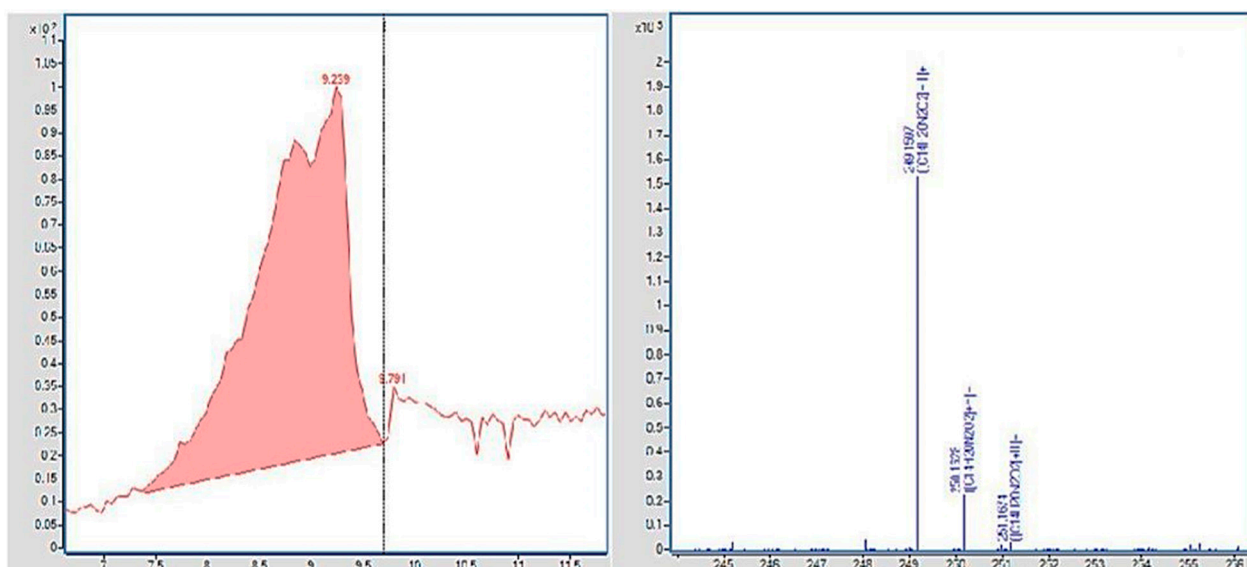

Figure S29. Chromatogram and MS spectrum results of a photolysis product #7.

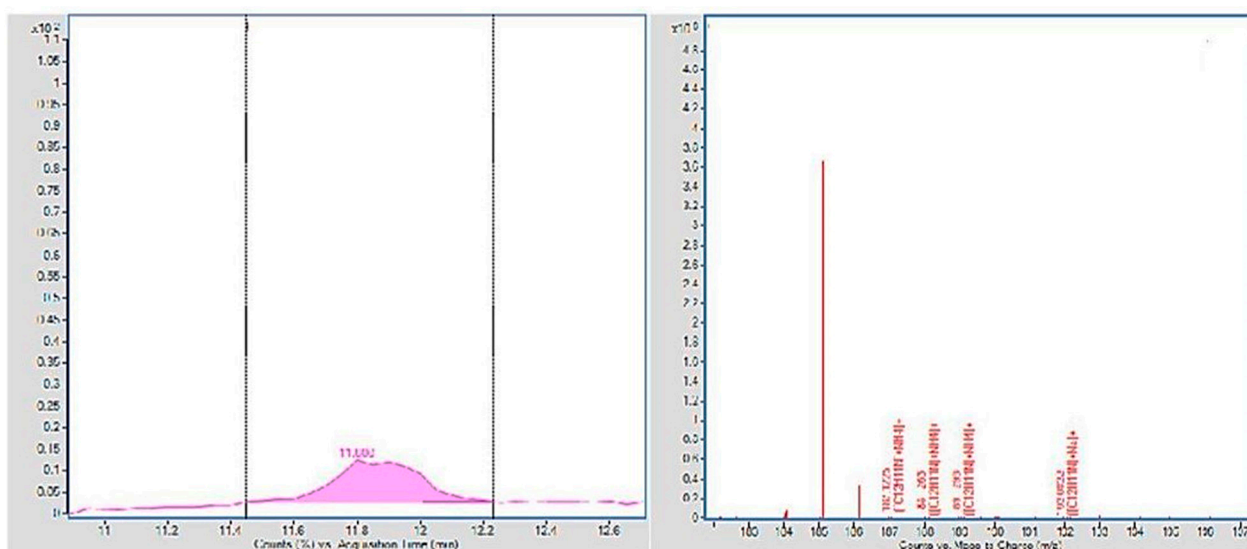

**Figure S30.** Chromatogram and MS spectrum results of a photolysis product #8.
